# Supplementary material for: A Computational Journey across Nitroxide Radicals: From Structure to Spectroscopic Properties and Beyond
Source: MDPI journal article supplement (doi:10.3390/molecules26237404), 2021-12-06
Supplement: s1 [file s1]

**Supporting Information:**

**A computational journey across nitroxide  
radicals: from structure to spectroscopic  
properties and beyond**

Vincenzo Barone,\* Marco Fusè, Sandra Mónica Vieira Pinto, and Nicola  
Tasinato

*Scuola Normale Superiore, Piazza dei Cavalieri 7, 56126 Pisa, Italy*

E-mail: [vincenzo.barone@sns.it](mailto:vincenzo.barone@sns.it)

# Contents

|          |                              |            |
|----------|------------------------------|------------|
| <b>1</b> | <b>Cartesian Coordinates</b> | <b>S-3</b> |
| 1.1      | CCF12 Geometry . . . . .     | S-4        |
| 1.2      | B2 Geometry . . . . .        | S-5        |

# 1 Cartesian Coordinates

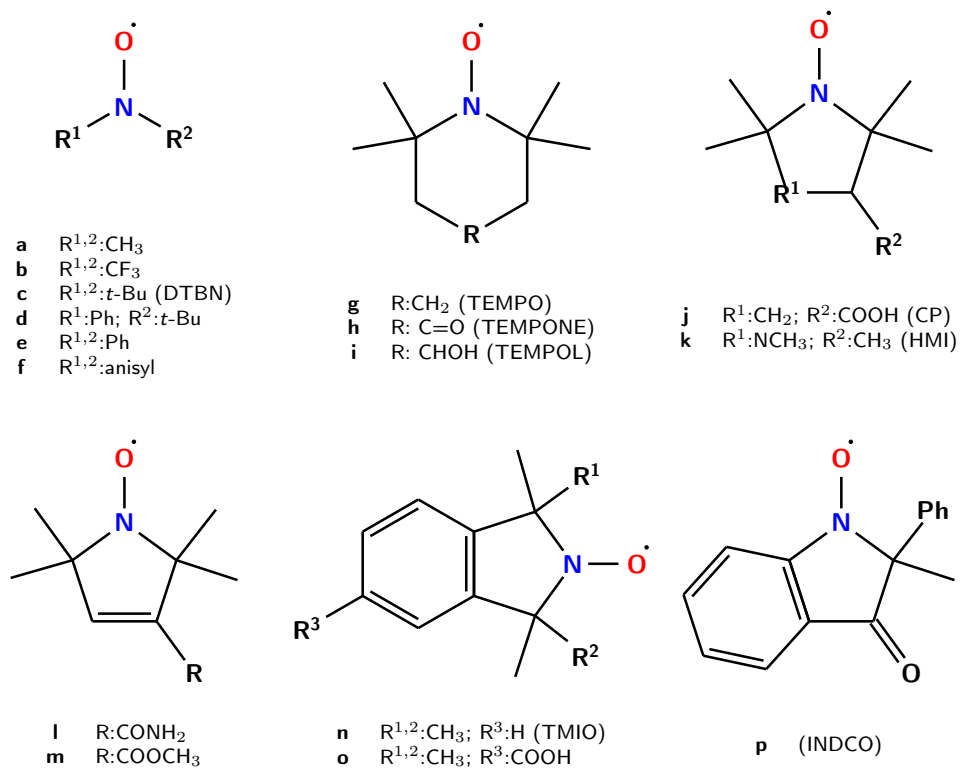

Figure S1: Molecular structures of the systems under investigation.

## 1.1 CCF12 Geometry

Here below the Cartesian coordinates of the dimethylnitroxide at the CCSD(T)-F12/CC-PVDZ-F12 level of theory are reported.

### a-min-f12

|                         |                      |               |               |
|-------------------------|----------------------|---------------|---------------|
| 10                      |                      |               |               |
| CCSD(T)-F12/CC-PVDZ-F12 | ENERGY=-209.43744669 |               |               |
| N                       | -0.1652567057        | -0.0410695080 | 0.0000070584  |
| O                       | 0.0495014046         | -1.3002380842 | -0.0001787706 |
| C                       | 0.0403166370         | 0.6763798830  | -1.2481398981 |
| C                       | 0.0403183822         | 0.6760979646  | 1.2483157350  |
| H                       | -0.5040360628        | 1.6199617649  | -1.2231184679 |
| H                       | -0.5040343525        | 1.6196854736  | 1.2235081791  |
| H                       | -0.3268452931        | 0.0488191718  | -2.0553214283 |
| H                       | -0.3268424194        | 0.0483549635  | 2.0553560203  |
| H                       | 1.1057957938         | 0.8783604365  | -1.4008125401 |
| H                       | 1.1057977525         | 0.8780440313  | 1.4010325017  |

### a-TS-f12

|                         |                      |               |               |
|-------------------------|----------------------|---------------|---------------|
| 10                      |                      |               |               |
| CCSD(T)-F12/CC-PVTZ-F12 | ENERGY=-209.46760885 |               |               |
| N                       | -0.0000780709        | -0.0420872872 | -0.0000001760 |
| O                       | -0.0001097767        | -1.3184700435 | -0.0000021383 |
| C                       | 0.0000052975         | 0.6864650274  | -1.2519555359 |
| C                       | 0.0000053076         | 0.6864657482  | 1.2519558450  |
| H                       | -0.8879137679        | 1.3204891671  | -1.3246093784 |
| H                       | -0.8879137226        | 1.3204906140  | 1.3246085141  |
| H                       | 0.0000538533         | -0.0454683744 | -2.0535345932 |
| H                       | 0.0000538291         | -0.0454663814 | 2.0535367343  |
| H                       | 0.8879422478         | 1.3204796896  | -1.3244875003 |
| H                       | 0.8879422075         | 1.3204811607  | 1.3244866017  |

## 1.2 B2 Geometry

**b**

|         |               |           |           |
|---------|---------------|-----------|-----------|
| 10      |               |           |           |
| Energy: | -805.03575048 |           |           |
| N       | -0.006524     | 0.615139  | -0.117025 |
| O       | -0.052767     | 1.878762  | -0.032136 |
| C       | -1.268928     | -0.110997 | -0.014382 |
| C       | 1.280615      | -0.086148 | -0.008236 |
| F       | -2.134228     | 0.396584  | -0.874637 |
| F       | -1.773100     | -0.001488 | 1.211208  |
| F       | -1.065361     | -1.395002 | -0.285701 |
| F       | 1.290333      | -0.870564 | 1.070367  |
| F       | 1.485688      | -0.847361 | -1.079704 |
| F       | 2.238521      | 0.807209  | 0.086065  |

**c**

|         |               |           |           |
|---------|---------------|-----------|-----------|
| 28      |               |           |           |
| Energy: | -445.37671366 |           |           |
| N       | -0.003065     | -0.489337 | -0.187150 |
| O       | 0.033998      | -1.768600 | -0.081257 |
| C       | -1.354020     | 0.153614  | -0.009090 |
| C       | 1.345514      | 0.157785  | -0.009617 |
| C       | -2.403678     | -0.937650 | -0.225251 |
| H       | -2.311327     | -1.732371 | 0.506729  |
| H       | -3.389151     | -0.482497 | -0.136654 |
| H       | -2.309534     | -1.379407 | -1.214415 |
| C       | -1.499941     | 0.703535  | 1.414584  |
| H       | -0.810080     | 1.518178  | 1.618927  |
| H       | -2.511962     | 1.084226  | 1.551758  |
| H       | -1.331583     | -0.086731 | 2.143967  |
| C       | -1.594073     | 1.250033  | -1.054175 |
| H       | -1.337503     | 0.891160  | -2.049682 |
| H       | -2.652914     | 1.505111  | -1.052214 |
| H       | -1.040779     | 2.160708  | -0.857845 |
| C       | 1.363689      | 1.658324  | -0.286507 |
| H       | 2.385249      | 2.005762  | -0.138453 |
| H       | 1.084443      | 1.884814  | -1.312251 |
| H       | 0.729989      | 2.225710  | 0.388791  |
| C       | 1.824978      | -0.116443 | 1.421250  |
| H       | 1.769912      | -1.181542 | 1.630640  |
| H       | 2.858825      | 0.209697  | 1.530444  |
| H       | 1.223150      | 0.417437  | 2.153915  |
| C       | 2.283728      | -0.526618 | -1.008400 |
| H       | 3.284530      | -0.108451 | -0.908980 |
| H       | 2.324004      | -1.595316 | -0.826803 |
| H       | 1.940230      | -0.361195 | -2.028847 |

d

26

Energy: -519.14908212

|   |           |           |           |
|---|-----------|-----------|-----------|
| O | -0.748000 | -0.922176 | 1.774595  |
| N | -0.297771 | -0.678538 | 0.599170  |
| C | -0.131808 | 0.685789  | 0.242165  |
| C | 0.105023  | 1.598680  | 1.274458  |
| C | 0.255292  | 2.946511  | 0.989315  |
| C | 0.164297  | 3.407984  | -0.321087 |
| C | -0.087951 | 2.502453  | -1.343994 |
| C | -0.239282 | 1.147991  | -1.071459 |
| H | 0.161863  | 1.229017  | 2.285603  |
| H | 0.446285  | 3.640090  | 1.795817  |
| H | -0.181724 | 2.847829  | -2.363759 |
| H | -0.466519 | 0.473982  | -1.878970 |
| H | 0.280535  | 4.459357  | -0.539961 |
| C | 0.056552  | -1.850438 | -0.272046 |
| C | -1.124684 | -2.167985 | -1.195744 |
| C | 1.341782  | -1.569178 | -1.053957 |
| C | 0.302440  | -3.044079 | 0.650912  |
| H | -2.023883 | -2.330658 | -0.604456 |
| H | -1.323354 | -1.372154 | -1.908773 |
| H | -0.913730 | -3.077161 | -1.757891 |
| H | 2.145608  | -1.286372 | -0.375918 |
| H | 1.639038  | -2.480310 | -1.570648 |
| H | 1.234098  | -0.786109 | -1.796488 |
| H | 0.594992  | -3.895022 | 0.037812  |
| H | 1.101208  | -2.831697 | 1.358067  |
| H | -0.587810 | -3.301422 | 1.214174  |

e

24

Energy: -592.92786581

|   |           |           |           |
|---|-----------|-----------|-----------|
| N | -0.000000 | 0.000000  | 0.978789  |
| O | -0.000000 | 0.000000  | 2.261650  |
| C | -0.000000 | 1.249611  | 0.302168  |
| C | 0.600682  | 2.339838  | 0.930101  |
| C | -0.633795 | 1.404680  | -0.931032 |
| C | 0.584016  | 3.579978  | 0.308628  |
| H | 1.061562  | 2.196072  | 1.894509  |
| C | -0.644638 | 2.652634  | -1.540460 |
| H | -1.128866 | 0.566642  | -1.396635 |
| C | -0.033218 | 3.742174  | -0.928679 |
| H | 1.056053  | 4.422845  | 0.792652  |
| H | -1.143660 | 2.773553  | -2.491213 |
| H | -0.044046 | 4.710146  | -1.408079 |
| C | -0.000000 | -1.249611 | 0.302168  |
| C | 0.633795  | -1.404680 | -0.931032 |
| C | -0.600682 | -2.339838 | 0.930101  |
| C | 0.644638  | -2.652634 | -1.540460 |
| H | 1.128866  | -0.566642 | -1.396635 |
| C | -0.584016 | -3.579978 | 0.308628  |
| H | -1.061562 | -2.196072 | 1.894509  |
| C | 0.033218  | -3.742174 | -0.928679 |
| H | 1.143660  | -2.773553 | -2.491213 |
| H | -1.056053 | -4.422845 | 0.792652  |
| H | 0.044046  | -4.710146 | -1.408079 |

f

32

Energy: -821.89861748

|   |           |           |           |
|---|-----------|-----------|-----------|
| O | -0.000001 | 2.832909  | -0.000001 |
| N | -0.000001 | 1.547215  | -0.000005 |
| C | 1.246127  | 0.871140  | 0.039924  |
| C | 2.325062  | 1.499172  | 0.669162  |
| C | 3.561961  | 0.887643  | 0.694556  |
| C | 3.749907  | -0.357873 | 0.087018  |
| C | 2.679319  | -0.978794 | -0.554856 |
| C | 1.432655  | -0.360378 | -0.578519 |
| O | 5.004311  | -0.876689 | 0.170804  |
| C | 5.240909  | -2.133006 | -0.445831 |
| C | -1.246127 | 0.871139  | -0.039931 |
| C | -2.325069 | 1.499176  | -0.669154 |
| C | -1.432650 | -0.360385 | 0.578503  |
| C | -3.561967 | 0.887647  | -0.694542 |
| C | -2.679314 | -0.978800 | 0.554845  |
| C | -3.749907 | -0.357873 | -0.087015 |
| O | -5.004312 | -0.876689 | -0.170793 |
| C | -5.240904 | -2.133012 | 0.445833  |
| H | -2.171509 | 2.466148  | -1.121619 |
| H | -4.403244 | 1.357397  | -1.182446 |
| H | -0.615429 | -0.835645 | 1.098934  |
| H | -2.799650 | -1.928956 | 1.049613  |
| H | -5.060595 | -2.085502 | 1.520837  |
| H | -6.285209 | -2.361896 | 0.264074  |
| H | -4.615783 | -2.912328 | 0.006992  |
| H | 2.171499  | 2.466140  | 1.121634  |
| H | 4.403232  | 1.357388  | 1.182471  |
| H | 2.799658  | -1.928945 | -1.049631 |
| H | 0.615439  | -0.835634 | -1.098961 |
| H | 4.615782  | -2.912327 | -0.007003 |
| H | 5.060610  | -2.085486 | -1.520836 |
| H | 6.285212  | -2.361892 | -0.264063 |



g

29

Energy: -483.47268394

|   |           |           |           |
|---|-----------|-----------|-----------|
| N | 0.203718  | -0.715521 | -0.000000 |
| O | 0.063008  | -1.989504 | -0.000000 |
| C | 0.017709  | -0.040268 | 1.320439  |
| C | 0.487681  | 1.415451  | 1.237575  |
| C | -0.014961 | 2.143633  | 0.000000  |
| C | 0.487681  | 1.415451  | -1.237575 |
| C | 0.017709  | -0.040268 | -1.320439 |
| C | -1.458434 | -0.131601 | 1.728859  |
| H | -1.793536 | -1.163874 | 1.657562  |
| H | -1.572783 | 0.201645  | 2.759950  |
| H | -2.099171 | 0.484953  | 1.103245  |
| C | 0.870582  | -0.793926 | 2.339386  |
| H | 0.808493  | -0.287579 | 3.302134  |
| H | 0.526381  | -1.817041 | 2.453174  |
| H | 1.912574  | -0.814182 | 2.024226  |
| H | 0.170628  | 1.921478  | 2.150388  |
| H | 1.580238  | 1.429945  | 1.230632  |
| H | -1.104106 | 2.203037  | 0.000000  |
| H | 0.349797  | 3.171048  | 0.000000  |
| H | 0.170628  | 1.921478  | -2.150388 |
| H | 1.580238  | 1.429945  | -1.230632 |
| C | -1.458434 | -0.131601 | -1.728859 |
| H | -1.572783 | 0.201645  | -2.759950 |
| H | -1.793536 | -1.163874 | -1.657562 |
| H | -2.099171 | 0.484953  | -1.103245 |
| C | 0.870582  | -0.793926 | -2.339386 |
| H | 0.526381  | -1.817041 | -2.453174 |
| H | 0.808493  | -0.287579 | -3.302134 |
| H | 1.912574  | -0.814182 | -2.024226 |

h

28

Energy: -557.48595647

|   |           |           |           |
|---|-----------|-----------|-----------|
| N | 0.000000  | -0.000000 | -1.035245 |
| O | 0.000000  | -0.000000 | -2.314394 |
| C | -0.809371 | 1.032704  | -0.334346 |
| C | -1.165270 | 0.531319  | 1.068538  |
| C | -0.000000 | 0.000000  | 1.870396  |
| C | 1.165270  | -0.531319 | 1.068538  |
| C | 0.809371  | -1.032704 | -0.334346 |
| C | 0.000000  | 2.334254  | -0.273205 |
| H | 0.306090  | 2.618521  | -1.277680 |
| H | -0.609973 | 3.134281  | 0.145048  |
| H | 0.891603  | 2.232980  | 0.343084  |
| C | -2.093764 | 1.262163  | -1.127473 |
| H | -2.720605 | 1.975472  | -0.593976 |
| H | -1.872649 | 1.652015  | -2.115640 |
| H | -2.645250 | 0.330865  | -1.243621 |
| H | -1.888566 | -0.284314 | 0.988300  |
| H | -1.647916 | 1.321468  | 1.641041  |
| O | -0.000000 | 0.000000  | 3.083857  |
| H | 1.647916  | -1.321468 | 1.641041  |
| H | 1.888566  | 0.284314  | 0.988300  |
| C | -0.000000 | -2.334254 | -0.273205 |
| H | -0.306090 | -2.618521 | -1.277680 |
| H | 0.609973  | -3.134281 | 0.145048  |
| H | -0.891603 | -2.232980 | 0.343084  |
| C | 2.093764  | -1.262163 | -1.127473 |
| H | 2.720605  | -1.975472 | -0.593976 |
| H | 1.872649  | -1.652015 | -2.115640 |
| H | 2.645250  | -0.330865 | -1.243621 |

30

Energy: -558.67900583

|   |           |           |           |
|---|-----------|-----------|-----------|
| C | -0.211615 | 1.806288  | 0.000000  |
| C | 0.349220  | 1.123398  | 1.234515  |
| C | 0.015232  | -0.368896 | 1.319216  |
| C | -1.446196 | -0.595469 | 1.729503  |
| C | 0.933914  | -1.037734 | 2.340282  |
| H | -1.299289 | 1.754209  | 0.000000  |
| H | 1.021881  | 3.324689  | 0.000000  |
| H | 1.437005  | 1.243442  | 1.222048  |
| H | -0.020043 | 1.615952  | 2.133867  |
| H | -1.591553 | -0.264492 | 2.757149  |
| H | -1.680135 | -1.655869 | 1.668602  |
| H | -2.144294 | -0.049644 | 1.099788  |
| H | 1.973669  | -0.961406 | 2.026511  |
| H | 0.685511  | -2.088350 | 2.452893  |
| H | 0.822978  | -0.539442 | 3.302568  |
| N | 0.265133  | -1.024742 | -0.000000 |
| O | 0.066055  | 3.205850  | 0.000000  |
| O | 0.246300  | -2.305775 | -0.000000 |
| C | 0.349220  | 1.123398  | -1.234515 |
| C | 0.015232  | -0.368896 | -1.319216 |
| H | 1.437005  | 1.243442  | -1.222048 |
| H | -0.020043 | 1.615952  | -2.133867 |
| C | -1.446196 | -0.595469 | -1.729503 |
| C | 0.933914  | -1.037734 | -2.340282 |
| H | -1.591553 | -0.264492 | -2.757149 |
| H | -1.680135 | -1.655869 | -1.668602 |
| H | -2.144294 | -0.049644 | -1.099788 |
| H | 1.973669  | -0.961406 | -2.026511 |
| H | 0.685511  | -2.088350 | -2.452893 |
| H | 0.822978  | -0.539442 | -3.302568 |

j

29

Energy: -632.71898619

|   |           |           |           |
|---|-----------|-----------|-----------|
| N | 1.275100  | 0.564405  | -0.027376 |
| O | 2.202555  | 1.429266  | 0.063969  |
| C | 1.530220  | -0.891897 | 0.082998  |
| C | 0.104818  | -1.438963 | 0.219346  |
| C | -0.772433 | -0.423322 | -0.520277 |
| C | -0.145668 | 0.954155  | -0.181657 |
| C | 2.225885  | -1.367903 | -1.194084 |
| H | 3.144311  | -0.803714 | -1.343095 |
| H | 2.473742  | -2.425942 | -1.115836 |
| H | 1.591973  | -1.226330 | -2.068552 |
| C | 2.399094  | -1.169946 | 1.302180  |
| H | 2.559915  | -2.242290 | 1.407025  |
| H | 3.363188  | -0.678279 | 1.195951  |
| H | 1.922699  | -0.799200 | 2.208264  |
| H | -0.179649 | -1.485762 | 1.267823  |
| C | -2.250485 | -0.454521 | -0.235839 |
| O | -3.087474 | 0.055582  | -0.942644 |
| C | -0.641861 | 1.545117  | 1.140245  |
| H | -0.002110 | 2.382825  | 1.409094  |
| H | -1.663834 | 1.908198  | 1.038223  |
| H | -0.610718 | 0.814107  | 1.945976  |
| C | -0.291509 | 1.964074  | -1.309620 |
| H | -1.343794 | 2.193192  | -1.465768 |
| H | 0.243558  | 2.877051  | -1.059783 |
| H | 0.120050  | 1.567476  | -2.236296 |
| H | 0.011074  | -2.440245 | -0.195858 |
| H | -0.682013 | -0.561924 | -1.597121 |
| O | -2.568461 | -1.093143 | 0.914813  |
| H | -3.531417 | -1.028490 | 1.004241  |

k

31

Energy: -538.08261683

|   |           |           |          |
|---|-----------|-----------|----------|
| N | 8.063114  | 8.927242  | 7.235577 |
| C | 7.220309  | 10.137056 | 7.308630 |
| N | 7.928800  | 11.010567 | 6.361109 |
| C | 9.346560  | 10.642029 | 6.397262 |
| C | 9.298311  | 9.106076  | 6.449182 |
| O | 7.691495  | 7.807710  | 7.709805 |
| C | 9.110562  | 8.443589  | 5.083475 |
| C | 10.476647 | 8.495102  | 7.192216 |
| H | 8.315311  | 8.929925  | 4.522925 |
| H | 8.844220  | 7.399205  | 5.234076 |
| H | 10.029601 | 8.484822  | 4.500858 |
| H | 11.398200 | 8.660858  | 6.635283 |
| H | 10.328074 | 7.423942  | 7.306799 |
| H | 10.582588 | 8.934388  | 8.182699 |
| C | 5.813047  | 9.824848  | 6.822672 |
| C | 7.202109  | 10.620028 | 8.764002 |
| H | 5.846570  | 9.456714  | 5.800579 |
| H | 5.195690  | 10.721357 | 6.854534 |
| H | 5.362186  | 9.068386  | 7.460722 |
| H | 8.195725  | 10.917052 | 9.095539 |
| H | 6.860647  | 9.803808  | 9.396919 |
| H | 6.524132  | 11.462460 | 8.888863 |
| C | 10.132434 | 11.222544 | 5.235113 |
| H | 9.642428  | 11.008061 | 4.288015 |
| H | 11.137322 | 10.802279 | 5.213148 |
| H | 10.235541 | 12.301231 | 5.332287 |
| C | 7.667147  | 12.429413 | 6.512378 |
| H | 8.117429  | 12.861766 | 7.416596 |
| H | 6.593975  | 12.603719 | 6.547690 |
| H | 8.055530  | 12.965985 | 5.650492 |
| H | 9.814462  | 10.988578 | 7.334265 |

28

Energy: -611.62488161

|   |           |           |           |
|---|-----------|-----------|-----------|
| O | -2.786272 | 1.039016  | -0.197765 |
| O | 2.536018  | 1.120380  | 0.529481  |
| N | -1.680721 | 0.414981  | -0.151131 |
| C | -0.376095 | 1.110077  | 0.008478  |
| C | 0.546275  | -0.086235 | 0.064283  |
| C | -0.127387 | -1.241390 | 0.070103  |
| C | -1.612539 | -1.057419 | -0.010377 |
| C | -0.388730 | 1.925090  | 1.304271  |
| C | -0.126258 | 2.011064  | -1.198934 |
| C | -2.231422 | -1.722228 | -1.240644 |
| C | -2.335083 | -1.498871 | 1.265529  |
| C | 2.020703  | 0.080127  | 0.144613  |
| H | 0.311535  | -2.225819 | 0.152625  |
| H | -1.204193 | 2.644254  | 1.257445  |
| H | -0.543849 | 1.278081  | 2.166053  |
| H | 0.557374  | 2.444118  | 1.423504  |
| H | -0.107439 | 1.429342  | -2.119387 |
| H | -0.926931 | 2.744344  | -1.269397 |
| H | 0.823715  | 2.527473  | -1.084155 |
| H | -3.273729 | -1.421281 | -1.324962 |
| H | -1.708382 | -1.421822 | -2.146486 |
| H | -2.185804 | -2.806861 | -1.149877 |
| H | -1.887725 | -1.038480 | 2.143963  |
| H | -3.379481 | -1.199162 | 1.207983  |
| H | -2.284175 | -2.581594 | 1.373889  |
| N | 2.764933  | -1.010643 | -0.210453 |
| H | 2.366371  | -1.742193 | -0.769116 |
| H | 3.762097  | -0.883568 | -0.241359 |

m

30

Energy: -670.77665600

|   |           |           |           |
|---|-----------|-----------|-----------|
| O | 2.812328  | 1.054963  | 0.000001  |
| O | -2.571713 | 1.130138  | -0.000000 |
| N | 1.706945  | 0.429142  | -0.000001 |
| O | -2.624411 | -1.124481 | 0.000000  |
| C | 0.392456  | 1.121366  | -0.000000 |
| C | -0.523737 | -0.079626 | -0.000000 |
| C | 0.146192  | -1.236598 | -0.000000 |
| C | 1.631230  | -1.049315 | -0.000000 |
| C | 0.268076  | 1.979709  | -1.259314 |
| C | 0.268078  | 1.979708  | 1.259314  |
| C | 2.299490  | -1.605634 | 1.259667  |
| C | 2.299491  | -1.605636 | -1.259666 |
| C | -1.990229 | 0.065539  | -0.000000 |
| C | -4.059375 | -1.045833 | -0.000000 |
| H | -0.313383 | -2.213138 | 0.000000  |
| H | 1.075545  | 2.708935  | -1.272606 |
| H | 0.341110  | 1.364533  | -2.154806 |
| H | -0.687523 | 2.497395  | -1.262657 |
| H | 0.341112  | 1.364531  | 2.154806  |
| H | 1.075546  | 2.708934  | 1.272606  |
| H | -0.687522 | 2.497394  | 1.262659  |
| H | 3.344809  | -1.303748 | 1.273224  |
| H | 1.814429  | -1.223928 | 2.155844  |
| H | 2.246196  | -2.693453 | 1.267884  |
| H | 1.814429  | -1.223932 | -2.155844 |
| H | 3.344809  | -1.303749 | -1.273223 |
| H | 2.246196  | -2.693455 | -1.267881 |
| H | -4.409709 | -0.522224 | -0.885324 |
| H | -4.404631 | -2.072914 | -0.000001 |
| H | -4.409709 | -0.522225 | 0.885324  |

|          |               | n         |           |
|----------|---------------|-----------|-----------|
| 30       |               |           |           |
| Energy : | -596.54866389 |           |           |
| N        | -0.000000     | -0.000000 | 1.512228  |
| O        | -0.000000     | -0.000000 | 2.783023  |
| C        | 0.000000      | 1.256226  | 0.720947  |
| C        | 0.000000      | 0.696814  | -0.676118 |
| C        | -0.000000     | -0.696814 | -0.676118 |
| C        | -0.000000     | -1.256226 | 0.720947  |
| C        | -1.258929     | 2.061606  | 1.045343  |
| H        | -1.273853     | 2.302431  | 2.106425  |
| H        | -1.269467     | 2.988167  | 0.472934  |
| H        | -2.154136     | 1.493077  | 0.801023  |
| C        | 1.258929      | 2.061606  | 1.045343  |
| H        | 1.269467      | 2.988167  | 0.472934  |
| H        | 1.273853      | 2.302431  | 2.106425  |
| H        | 2.154136      | 1.493077  | 0.801023  |
| C        | 0.000000      | 1.402304  | -1.872511 |
| H        | 0.000000      | 2.484041  | -1.876985 |
| C        | 0.000000      | 0.697195  | -3.073348 |
| H        | 0.000000      | 1.233578  | -4.011502 |
| C        | -0.000000     | -0.697195 | -3.073348 |
| H        | -0.000000     | -1.233578 | -4.011502 |
| C        | -0.000000     | -1.402304 | -1.872511 |
| H        | -0.000000     | -2.484041 | -1.876985 |
| C        | 1.258929      | -2.061606 | 1.045343  |
| H        | 1.273853      | -2.302431 | 2.106425  |
| H        | 1.269467      | -2.988167 | 0.472934  |
| H        | 2.154136      | -1.493077 | 0.801023  |
| C        | -1.258929     | -2.061606 | 1.045343  |
| H        | -1.269467     | -2.988167 | 0.472934  |
| H        | -1.273853     | -2.302431 | 2.106425  |
| H        | -2.154136     | -1.493077 | 0.801023  |



## O

33

Energy: -785.08776864

|   |           |           |           |
|---|-----------|-----------|-----------|
| C | -2.253211 | -0.267680 | 0.000001  |
| C | -1.853455 | -1.607894 | 0.000001  |
| H | -2.615260 | -2.372921 | 0.000001  |
| C | -0.505296 | -1.938567 | 0.000001  |
| H | -0.201600 | -2.976343 | 0.000001  |
| C | 0.440251  | -0.919456 | 0.000001  |
| C | 0.043271  | 0.417194  | 0.000001  |
| C | -1.300839 | 0.754756  | 0.000002  |
| H | -1.619853 | 1.786263  | 0.000002  |
| C | 1.937598  | -1.057022 | -0.000000 |
| C | 2.475408  | -1.737822 | -1.259650 |
| H | 3.560819  | -1.663856 | -1.275109 |
| H | 2.193063  | -2.789581 | -1.268574 |
| H | 2.078164  | -1.263817 | -2.155074 |
| C | 2.475410  | -1.737823 | 1.259648  |
| H | 2.078167  | -1.263819 | 2.155073  |
| H | 3.560821  | -1.663857 | 1.275105  |
| H | 2.193065  | -2.789583 | 1.268571  |
| C | 1.222359  | 1.352285  | 0.000001  |
| C | 1.301700  | 2.216098  | -1.259312 |
| H | 0.488133  | 2.940067  | -1.269616 |
| H | 2.249395  | 2.750437  | -1.274023 |
| H | 1.230753  | 1.601639  | -2.154713 |
| C | 1.301701  | 2.216097  | 1.259314  |
| H | 0.488134  | 2.940066  | 1.269619  |
| H | 2.249397  | 2.750436  | 1.274024  |
| H | 1.230755  | 1.601639  | 2.154715  |
| C | -3.706603 | 0.020123  | 0.000000  |
| O | -3.982142 | 1.348752  | -0.000002 |
| H | -4.947479 | 1.421012  | -0.000004 |
| O | -4.580606 | -0.816844 | -0.000001 |
| N | 2.338184  | 0.372642  | 0.000000  |
| O | 3.556057  | 0.733341  | -0.000002 |

| p       |               |           |           |
|---------|---------------|-----------|-----------|
| 30      |               |           |           |
| Energy: | -783.61897073 |           |           |
| C       | 3.000248      | -0.858326 | 0.112410  |
| C       | 1.626258      | -0.700087 | -0.082651 |
| C       | 1.040802      | 0.550896  | -0.241604 |
| C       | 1.892658      | 1.645618  | -0.210154 |
| C       | 3.275310      | 1.504244  | -0.020596 |
| C       | 3.839638      | 0.247319  | 0.147857  |
| C       | 3.288565      | -2.287379 | 0.292641  |
| C       | 1.956705      | -3.050796 | 0.066369  |
| H       | -0.024352     | 0.648282  | -0.381298 |
| H       | 1.479121      | 2.636521  | -0.334150 |
| H       | 3.900612      | 2.384522  | -0.003145 |
| H       | 4.900671      | 0.116766  | 0.304019  |
| N       | 0.988771      | -1.934575 | -0.071299 |
| O       | 4.342495      | -2.811316 | 0.580400  |
| O       | -0.269525     | -2.096305 | -0.126528 |
| C       | 1.589501      | -3.903767 | 1.276039  |
| H       | 0.622383      | -4.371145 | 1.110587  |
| H       | 2.344692      | -4.671313 | 1.418812  |
| H       | 1.540731      | -3.290987 | 2.175027  |
| C       | 2.053643      | -3.857210 | -1.220684 |
| C       | 2.992175      | -4.890306 | -1.295902 |
| C       | 1.250970      | -3.586146 | -2.328298 |
| C       | 3.118431      | -5.641839 | -2.457225 |
| H       | 3.639487      | -5.090825 | -0.455410 |
| C       | 1.380811      | -4.342953 | -3.489565 |
| H       | 0.511022      | -2.802422 | -2.286109 |
| C       | 2.311585      | -5.372232 | -3.558806 |
| H       | 3.850754      | -6.435388 | -2.501523 |
| H       | 0.747947      | -4.125303 | -4.338156 |
| H       | 2.409250      | -5.958426 | -4.461313 |
